# Supplementary material
Source: MDPI journal article supplement (https://www.mdpi.com/2073-4395/11/12/2429)
Supplement: s1 [file s1]

**Table S1** key word list

|         |                                           |                                                                                                                                                                                                                                                                                                               |
|---------|-------------------------------------------|---------------------------------------------------------------------------------------------------------------------------------------------------------------------------------------------------------------------------------------------------------------------------------------------------------------|
| Topic 1 | Yield                                     |                                                                                                                                                                                                                                                                                                               |
| Topic 2 | Organic materials type                    | Straw;<br><br>Biochar:<br><br>bio-carbon, chrol, biochar based fertilizer;<br><br>Animal manure:<br><br>cow dung, cow dropping, cow and bullock<br>manure, cow manure, cow dung compost;<br><br>chicken manure, poultry dung, hen dung;<br><br>pig mannure;<br><br>Digestate: biogas residue, orthophosphate; |
| Topic 3 | Reduced<br><br>synthetic fertilizer input | Reducing nitrogen rate, nitrogen fertilizer<br>reduction, reducing chemical N fertilizer<br>application, nitrogen application rates                                                                                                                                                                           |

**Table S2** Information of long-term field experiments in the published references.

| No. | Site     | Latitude, longitude         | Regional distribution | Type of organic materials | Organic material replacement rate (%) | N fertilizer input (kg·hm <sup>-2</sup> ) | Experimental duration (y <sup>-1</sup> ) | Literature |
|-----|----------|-----------------------------|-----------------------|---------------------------|---------------------------------------|-------------------------------------------|------------------------------------------|------------|
| 1   | Ningxia  | 106°38'20.4"N, 39°1'58.05"E | Northwest China       | Chicken manure            | 66.7                                  | 540                                       | 4                                        | [1]        |
| 2   | Guangxi  | 24°43'N, 108°18'E           | South Central China   | Cow manure                | 30                                    | 200                                       | 5                                        | [2]        |
| 3   | Guangxi  | 24°43'N, 108°18'E           | South Central China   | Cow manure                | 60                                    | 200                                       | 5                                        | [2]        |
| 4   | Jiangsu  | 32°26'24"N, 120°29'24"E     | East china            | Pig manure                | 20                                    | 240                                       | 1                                        | [3]        |
| 5   | Shanxi   | 33°8'3"N, 107°0'40"E        | East china            | biogas residue            | 20                                    | 180                                       | 1                                        | [4]        |
| 6   | Shanxi   | 33°8'3"N, 107°0'40"E        | East china            | Rape straw                | 20                                    | 180                                       | 1                                        | [4]        |
| 7   | Shandong | 36°57'N, 117°58'E           | North China           | Chicken manure            | 50                                    | 152                                       | 2                                        | [5]        |
| 8   | Gansu    | 35°29'42"N, 107°29'36"E     | Northwest China       | Cow manure                | 5.5                                   | 180                                       | 1                                        | [6]        |

|    |         |                           |                     |                    |      |     |   |      |
|----|---------|---------------------------|---------------------|--------------------|------|-----|---|------|
| 9  | Gansu   | 35°29'42"N, 107°29'36"E   | Northwest China     | Cow manure         | 11   | 180 | 1 | [6]  |
| 10 | Gansu   | 35°29'42"N, 107°29'36"E   | Northwest China     | Cow manure         | 16.5 | 180 | 1 | [6]  |
| 11 | Hunan   | 27°57'23N, 113°18'46.3E   | South Central China | Chicken manure     | 20   | 165 | 1 | [7]  |
| 12 | Hunan   | 27°57'23N, 113°18'46.3E   | South Central China | Chicken manure     | 40   | 165 | 1 | [7]  |
| 13 | Hunan   | 27°57'23N, 113°18'46.3E   | South Central China | Chicken manure     | 60   | 165 | 1 | [7]  |
| 14 | Gansu   | 35°28'26"N, 104°44'50"E   | Northwest China     | Cow manure         | 50   | 150 | 3 | [8]  |
| 15 | Gansu   | 27°57'23N, 113°18'46.3E   | Northwest China     | Cow manure         | 37.5 | 150 | 3 | [8]  |
| 16 | Gansu   | 27°57'23N, 113°18'46.3E   | Northwest China     | Cow manure         | 25   | 150 | 3 | [8]  |
| 17 | Gansu   | 27°57'23N, 113°18'46.3E   | Northwest China     | Cow manure         | 12.5 | 150 | 3 | [8]  |
| 18 | Jilin   | 44.80°N, 129.49°E         | North China         | Pig manure         | 42.6 | 225 | 1 | [9]  |
| 19 | Jilin   | 43°30'23"N, 124°48'33.9"E | North China         | Pig manure         | 70   | 165 | 1 | [10] |
| 20 | Jilin   | 43°30'23"N, 124°48'33.9"E | North China         | Maize straw        | 32   | 165 | 1 | [10] |
| 21 | Jiangxi | 28°20'12"N, 116°05'3"E    | East china          | Pig manure (early) | 14   | 150 | 1 | [11] |

|    |          |                                 |                 |                   |      |     |   |      |
|----|----------|---------------------------------|-----------------|-------------------|------|-----|---|------|
| 22 | Jiangxi  | 28°20'12"N, 116°05'3"E          | East china      | Pig manure (late) | 14   | 150 | 1 | [11] |
| 23 | Zhejiang | 30°50'20"N, 120°42' 42"E        | East china      | straw             | 15.4 | 195 | 2 | [12] |
| 24 | Zhejiang | 30°50'20"N, 120°42' 42"E        | East china      | straw             | 11.1 | 270 | 2 | [12] |
| 25 | Zhejiang | 30°50'20"N, 120°42' 42"E        | East china      | straw             | 8.7  | 345 | 2 | [12] |
| 26 | Shanxi   | 34°17'51"N, 108°00'48"E         | Northwest China | Cow manure        | 25   | 345 | 3 | [13] |
| 27 | Shanxi   | 34°17'51"N, 108°00'48"E         | Northwest China | Cow manure        | 50   | 345 | 3 | [13] |
| 28 | Shanxi   | 34°17'51"N, 108°00'48"E         | Northwest China | Cow manure        | 70   | 345 | 3 | [13] |
| 29 | Shanxi   | 34°17'51"N, 108°00'48"E         | Northwest China | Cow manure        | 25   | 345 | 3 | [13] |
| 30 | Shanxi   | 34°17'51"N, 108°00'48"E         | Northwest China | Cow manure        | 50   | 345 | 3 | [13] |
| 31 | Shanxi   | 34°17'51"N, 108°00'48"E         | Northwest China | Cow manure        | 70   | 345 | 3 | [13] |
| 32 | Gansu    | 35°34'50.16"N,<br>104°37'33.6"E | Northwest China | Cow manure        | 50   | 200 | 3 | [14] |
| 33 | Gansu    | 35°34'50.16"N,                  | Northwest China | Cow manure        | 37.5 | 200 | 3 | [14] |

|    |           |                                 |                 |                |      |     |    |      |
|----|-----------|---------------------------------|-----------------|----------------|------|-----|----|------|
|    |           | 104°37'33.6"E                   |                 |                |      |     |    |      |
| 34 | Gansu     | 35°34'50.16"N,<br>104°37'33.6"E | Northwest China | Cow manure     | 25   | 200 | 3  | [14] |
| 35 | Gansu     | 35°34'50.16"N,<br>104°37'33.6"E | Northwest China | Cow manure     | 12.5 | 200 | 3  | [14] |
| 36 | Sichuan   | 30°18'27N, 106°24'0.3"E         | Southwest china | Pig manure     | 30   | 150 | 16 | [15] |
| 37 | Sichuan   | 30°18'27N, 106°24'0.3"E         | Southwest china | Pig manure     | 50   | 150 | 16 | [15] |
| 38 | Sichuan   | 30°18'27N, 106°24'0.3"E         | Southwest china | Pig manure     | 70   | 150 | 16 | [15] |
| 39 | Shandong  | 34°50'38"N, 115°34'55"E         | East china      | Cow manure     | 50   | 210 | 5  | [16] |
| 40 | Shandong  | 34°50'38"N, 115°34'55"E         | East china      | Cow manure     | 33.3 | 210 | 5  | [16] |
| 41 | Shandong  | 34°50'38"N, 115°34'55"E         | East china      | Cow manure     | 25   | 210 | 5  | [16] |
| 42 | Shandong  | 34°50'38"N, 115°34'55"E         | East china      | Cow manure     | 20   | 210 | 5  | [16] |
| 43 | Chongqing | 30°26'N, 106°26'E               | Southwest china | Chicken manure | 50   | 180 | 8  | [17] |

|    |          |                            |            |            |    |     |   |      |
|----|----------|----------------------------|------------|------------|----|-----|---|------|
| 44 | Shandong | 35°26'34"N, 117°49'13"E    | East china | Cow manure | 75 | 150 | 3 | [18] |
| 45 | Shandong | 35°26'34"N, 117°49'13"E    | East china | Cow manure | 50 | 150 | 3 | [18] |
| 46 | Shandong | 35°26'34"N, 117°49'13"E    | East china | Cow manure | 25 | 150 | 3 | [18] |
| 47 | Shandong | 35°26'34"N, 117°49'13"E    | East china | Cow manure | 75 | 225 | 3 | [18] |
| 48 | Shandong | 35°26'34"N, 117°49'13"E    | East china | Cow manure | 50 | 225 | 3 | [18] |
| 49 | Shandong | 35°26'34"N, 117°49'13"E    | East china | Cow manure | 25 | 225 | 3 | [18] |
| 50 | Jiangsu  | 120°45'10"E, 31°39'12.96"N | East china | Pig manure | 15 | 180 | 1 | [19] |
| 51 | Jiangsu  | 120°45'10"E, 31°39'12.96"N | East china | Pig manure | 29 | 180 | 1 | [19] |
| 52 | Jiangsu  | 120°45'10"E, 31°39'12.96"N | East china | Pig manure | 34 | 180 | 1 | [19] |
| 53 | Jiangsu  | 120°45'10"E, 31°39'12.96"N | East china | Pig manure | 44 | 180 | 1 | [19] |
| 54 | Jiangsu  | 120°45'10"E, 31°39'12.96"N | East china | Pig manure | 15 | 240 | 1 | [19] |
| 55 | Jiangsu  | 120°45'10"E, 31°39'12.96"N | East china | Pig manure | 29 | 240 | 1 | [19] |
| 56 | Jiangsu  | 120°45'10"E, 31°39'12.96"N | East china | Pig manure | 34 | 240 | 1 | [19] |

|    |         |                            |                 |            |      |     |   |      |
|----|---------|----------------------------|-----------------|------------|------|-----|---|------|
| 57 | Jiangsu | 120°45'10"E, 31°39'12.96"N | East china      | Pig manure | 44   | 240 | 1 | [19] |
| 58 | Jiangsu | 120°45'10"E, 31°39'12.96"N | East china      | Pig manure | 15   | 270 | 1 | [19] |
| 59 | Jiangsu | 120°45'10"E, 31°39'12.96"N | East china      | Pig manure | 29   | 270 | 1 | [19] |
| 60 | Jiangsu | 120°45'10"E, 31°39'12.96"N | East china      | Pig manure | 34   | 270 | 1 | [19] |
| 61 | Jiangsu | 120°45'10"E, 31°39'12.96"N | East china      | Pig manure | 44   | 270 | 1 | [19] |
| 62 | Jiangsu | 120°45'10"E, 31°39'12.96"N | East china      | Pig manure | 15   | 300 | 1 | [19] |
| 63 | Jiangsu | 120°45'10"E, 31°39'12.96"N | East china      | Pig manure | 29   | 300 | 1 | [19] |
| 64 | Jiangsu | 120°45'10"E, 31°39'12.96"N | East china      | Pig manure | 34   | 300 | 1 | [19] |
| 65 | Jiangsu | 120°45'10"E, 31°39'12.96"N | East china      | Pig manure | 44   | 300 | 1 | [19] |
| 66 | Gansu   | 104°44'27"E, 35°28'3"N     | Northwest China | Cow manure | 50   | 200 | 3 | [20] |
| 67 | Gansu   | 104°44'27"E, 35°28'3"N     | Northwest China | Cow manure | 37.5 | 200 | 3 | [20] |
| 68 | Gansu   | 104°44'27"E, 35°28'3"N     | Northwest China | Cow manure | 25   | 200 | 3 | [20] |
| 69 | Gansu   | 104°44'27"E, 35°28'3"N     | Northwest China | Cow manure | 12.5 | 200 | 3 | [20] |

|    |         |                             |                     |                |      |     |    |      |
|----|---------|-----------------------------|---------------------|----------------|------|-----|----|------|
| 70 | Hunan   | 111°52'37.3"E, 26°45'21.6"N | South Central China | Pig manure     | 50   | 150 | 1  | [21] |
| 71 | Beijing | 40°13'N, 116°15'E           | North China         | Pig manure     | 50   | 240 | 5  | [22] |
| 72 | Hebei   | 37. 8°N, 114. 7°E           | North China         | Cow manure     | 20   | 250 | 3  | [23] |
| 73 | Hebei   | 37. 8°N, 114. 7°E           | North China         | Cow manure     | 35   | 250 | 3  | [23] |
| 74 | Hebei   | 37. 8°N, 114. 7°E           | North China         | Cow manure     | 50   | 250 | 3  | [23] |
| 75 | Gansu   | 35°29'42"N, 107°29'36"E     | Northwest China     | Wheat straw    | 30.2 | 180 | 11 | [24] |
| 76 | Jiangsu | 31°39'34"N, 120°45'34"E     | East china          | Pig manure     | 7.86 | 330 | 1  | [25] |
| 77 | Jiangsu | 31°39'34"N, 120°45'34"E     | East china          | Pig manure     | 15.7 | 330 | 1  | [25] |
| 78 | Jiangsu | 31°39'34"N, 120°45'34"E     | East china          | Pig manure     | 23.6 | 330 | 1  | [25] |
| 79 | Jiangsu | 31°39'34"N, 120°45'34"E     | East china          | Pig manure     | 31.5 | 330 | 1  | [25] |
| 80 | Hunan   | 26°45'36"N, 111°52'12"E     | South Central China | Pig manure     | 50   | 150 | 6  | [26] |
| 81 | Sichuan | 28°50'32"N, 104°58'35"E     | Southwest china     | Chicken manure | 15   | 240 | 1  | [27] |
| 82 | Sichuan | 28°50'32"N, 104°58'35"E     | Southwest china     | Chicken manure | 30   | 240 | 1  | [27] |



|    |           |                             |                     |                  |    |     |    |      |
|----|-----------|-----------------------------|---------------------|------------------|----|-----|----|------|
| 83 | Hubei     | 30°22'54.5"N, 112°37'21.5"E | South Central China | Chicken manure   | 50 | 160 | 2  | [28] |
| 84 | Hubei     | 30°22'54.5"N, 112°37'21.5"E | South Central China | Chicken manure   | 50 | 180 | 2  | [28] |
| 85 | Shandong  | 35°26'21"N, 117°50'11"E     | East china          | Cow manure       | 25 | 375 | 5  | [29] |
| 86 | Shandong  | 35°26'21"N, 117°50'11"E     | East china          | Cow manure       | 50 | 375 | 5  | [29] |
| 87 | Shandong  | 35°26'21"N, 117°50'11"E     | East china          | Cow manure       | 75 | 375 | 5  | [29] |
| 88 | Shanghai  | 30°53'N, 121°23'E           | East china          | straw            |    | 225 | 5  | [30] |
| 89 | Changping | 40°13'12"N, 116°15'23"E     | Central China       | Pig manure       | 70 | 150 | 15 | [31] |
| 90 | Zhengzhou | 34°47'25"N, 113°40'42"E     | Central China       | Horse&Cow manure | 70 | 165 | 15 | [31] |
| 91 | Yangling  | 34°17'51"N, 108°00'48"E     | Central China       | Cow manure       | 70 | 165 | 15 | [31] |
| 92 | Qiyang    | 26°45'12"N, 111°52'32"E     | South China         | Pig manure       | 70 | 190 | 15 | [31] |
| 93 | Shanxi    | 34°42'N, 108°09'E           | Northwest China     | Pig manure       | 30 | 120 | 2  | [32] |
| 94 | Shanxi    | 34°42'N, 108°09'E           | Northwest China     | Pig manure       | 50 | 120 | 2  | [32] |
| 95 | Guizhou   | 27°45'35"N, 108°11'35"E     | Southwest china     | Biochar          | 10 | 150 | 1  | [33] |

|     |          |                         |                     |                    |      |        |    |      |
|-----|----------|-------------------------|---------------------|--------------------|------|--------|----|------|
| 96  | Guizhou  | 27°45'35"N, 108°11'35"E | Southwest china     | Biochar            | 20   | 150    | 1  | [33] |
| 97  | Guizhou  | 27°45'35"N, 108°11'35"E | Southwest china     | Biochar            | 30   | 150    | 1  | [33] |
| 98  | Guizhou  | 27°45'35"N, 108°11'35"E | Southwest china     | Biochar            | 40   | 150    | 1  | [34] |
| 99  | Jiangsu  | 31°43'14"N, 118°46'12"E | East china          | Chicken manure     | 30   |        | 1  | [34] |
| 100 | Jiangsu  | 31°43'14"N, 118°46'12"E | East china          | Pig manure         | 30   |        | 1  | [34] |
| 101 | Jiangxi  | 28°57'N, 115°94'E       | East china          | Pig manure         | 30   | 180    | 10 | [34] |
| 102 | Jiangxi  | 28°57'N, 115°94'E       | East china          | Pig manure         | 50   | 180    | 10 | [35] |
| 103 | Jiangxi  | 28°57'N, 115°94'E       | East china          | Pig manure         | 70   | 180    | 10 | [35] |
| 104 | Hunan    | 28°33'04"N, 113°19'52"E | South Central China | Pig manure (early) | 50   | 120    | 2  | [36] |
| 105 | Hunan    | 28°33'04"N, 113°19'52"E | South Central China | Pig manure (late)  | 50   | 120    | 2  | [36] |
| 106 | Shanghai | 30°54'6"N, 121°40'31"E  | East china          | Pig manure         | 21.4 | 262.95 | 1  | [36] |
| 107 | Shanghai | 30°54'6"N, 121°40'31"E  | East china          | Pig manure         | 50   | 262.95 | 1  | [37] |
| 108 | Shanghai | 30°54'6"N, 121°40'31"E  | East china          | Pig manure         | 75   | 262.95 | 1  | [37] |

|     |         |                         |                     |                          |      |     |   |      |
|-----|---------|-------------------------|---------------------|--------------------------|------|-----|---|------|
| 109 | Ningxia | 38°03'16"N, 106°12'03"E | Northwest China     | Cow manure               | 30   | 330 | 2 | [38] |
| 110 | Ningxia | 38°03'16"N, 106°12'03"E | Northwest China     | Cow manure               | 21.8 | 240 | 2 | [38] |
| 111 | Hunan   | 28°31'6"N, 113°22'32"E  | South Central China | Pig&Chicken manure       | 15   | 180 | 1 | [38] |
| 112 | Hunan   | 28°31'6"N, 113°22'32"E  | South Central China | Pig&Chicken manure       | 30   | 180 | 1 | [39] |
| 113 | Hunan   | 28°31'6"N, 113°22'32"E  | South Central China | Pig&Chicken manure       | 45   | 180 | 1 | [39] |
| 114 | Hunan   | 28°31'6"N, 113°22'32"E  | South Central China | Pig&Chicken manure       | 60   | 180 | 1 | [40] |
| 115 | Shanxi  | 34°19'44"N, 108°42'21"E | Northwest China     | Chicken manure           | 18.1 |     | 2 | [40] |
| 116 | Shanxi  | 34°19'44"N, 108°42'21"E | Northwest China     | Pig manure               | 19.4 |     | 2 | [40] |
| 117 | Shanxi  | 34°19'44"N, 108°42'21"E | Northwest China     | Chicken manure           | 18.1 |     | 2 | [40] |
| 118 | Shanxi  | 34°19'44"N, 108°42'21"E | Northwest China     | Pig manure               | 19.4 |     | 2 | [41] |
| 119 | Gansu   | 37°41'4"N, 102°51'24"E  | Northwest China     | Horse&Cow manure & straw | 30   | 184 | 2 | [41] |
| 120 | Gansu   | 43°50'37"N, 125°14'49"E | Northwest China     | Chicken manure           | 10   | 230 | 2 | [41] |
| 121 | Gansu   | 43°50'37"N, 125°14'49"E | Northwest China     | Chicken manure           | 20   | 230 | 2 | [41] |

|     |         |                             |                 |                |    |     |    |      |
|-----|---------|-----------------------------|-----------------|----------------|----|-----|----|------|
| 122 | Gansu   | 43°50'37"N, 125°14'49"E     | Northwest China | Chicken manure | 30 | 230 | 2  | [42] |
| 123 | Shanxi  | 36°13.2'N, 111°33.7'E       | North China     | Chicken manure | 30 | 300 | 3  | [43] |
| 124 | Shanxi  | 36°13.2'N, 111°33.7'E       | North China     | Chicken manure | 30 | 225 | 3  | [43] |
| 125 | Shanxi  | 36°26'16.62"N, 111°32'4"E   | North China     | Chicken manure | 45 | 150 | 6  | [43] |
| 126 | Anhui   | 117°40'59"E, 31°39'43"N     | East china      | Pig manure     | 30 | 192 | 1  | [44] |
| 127 | Anhui   | 117°40'59"E, 31°39'43"N     | East china      | Pig manure     | 50 | 192 | 1  | [44] |
| 128 | Anhui   | 117°40'59"E, 31°39'43"N     | East china      | straw          | 30 | 192 | 1  | [45] |
| 129 | Anhui   | 117°40'59"E, 31°39'43"N     | East china      | straw          | 50 | 192 | 1  | [46] |
| 130 | Jiangxi | 28°45'44"N, 115°49'59"E     | East china      | biogas residue |    | 240 | 20 | [46] |
| 131 | Jiangxi | 28°45'44"N, 115°49'59"E     | East china      | biogas residue |    | 270 | 20 | [46] |
| 132 | Sichuan | 30°57'0.99"N, 103°44'3.69"E | Southwest china | Pig manure     | 75 | 180 | 1  | [46] |
| 133 | Sichuan | 30°57'0.99"N, 103°44'3.69"E | Southwest china | Pig manure     | 50 | 180 | 1  | [47] |
| 134 | Sichuan | 30°57'0.99"N, 103°44'3.69"E | Southwest china | Pig manure     | 75 | 180 | 1  | [47] |

|     |          |                             |                 |            |    |     |   |      |
|-----|----------|-----------------------------|-----------------|------------|----|-----|---|------|
| 135 | Sichuan  | 30°57'0.99"N, 103°44'3.69"E | Southwest china | Pig manure | 50 | 180 | 1 | [48] |
| 136 | Shenyang | 41°49'36.3"N, 123°34'11.1"E | Northeast china | Pig manure | 10 | 240 | 2 | [48] |
| 137 | Shenyang | 41°49'36.3"N, 123°34'11.1"E | Northeast china | Pig manure | 20 | 240 | 2 | [48] |
| 138 | Shenyang | 41°49'36.3"N, 123°34'11.1"E | Northeast china | Pig manure | 30 | 240 | 2 | [48] |
| 139 | jiangxi  | 28°33'92"N, 115°56'25"E     | East china      | Pig manure | 30 | 180 |   | [49] |
| 140 | Jiangxi  | 28°33'92"N, 115°56'25"E     | East china      | Pig manure | 50 | 180 |   | [49] |
| 141 | Jiangxi  | 28°33'92"N, 115°56'25"E     | East china      | Pig manure | 70 | 180 |   | [49] |
| 142 | jiangsu  | 31° 27' N, 120°25'E         | East china      | Pig manure | 25 | 300 | 1 | [50] |
| 143 | Jiangsu  | 31° 27' N, 120°25'E         | East china      | Pig manure | 50 | 300 | 1 | [50] |
| 144 | Jiangsu  | 31° 27' N, 120°25'E         | East china      | Pig manure | 75 | 300 | 1 | [50] |
| 145 | Yunnan   | 25°31'07"N, 103°16'41"E     | Southwest china | Pig manure | 10 | 240 | 1 | [51] |
| 146 | Yunnan   | 25°31'07"N, 103°16'41"E     | Southwest china | Pig manure | 20 | 240 | 1 | [51] |
| 147 | Yunnan   | 25°31'07"N, 103°16'41"E     | Southwest china | Pig manure | 30 | 240 | 1 | [51] |

|     |          |                           |                 |                |      |     |   |      |
|-----|----------|---------------------------|-----------------|----------------|------|-----|---|------|
| 148 | yunnan   | 25°31'07"N, 103°16'41"E   | Southwest china | Pig manure     | 40   | 240 | 1 | [52] |
| 149 | Nanjing  | 32°1'4.152"N, 118°51'25"E | East china      | Pig manure     | 55.5 | 180 | 1 | [52] |
| 150 | Nanjing  | 32°1'4.152"N, 118°51'25"E | East china      | Chicken manure | 55.5 | 180 | 1 | [52] |
| 151 | Jiangxi  | 27°48'0.5"N, 115°21'18"E  | East china      | Pig manure     | 16.3 | 165 | 2 | [52] |
| 152 | jiangxi  | 27°48'0.5"N, 115°21'18"E  | East china      | Pig manure     | 20.5 | 165 | 2 | [53] |
| 153 | Jiangxi  | 27°48'0.5"N, 115°21'18"E  | East china      | Pig manure     | 24.6 | 165 | 2 | [53] |
| 154 | Xinjiang | 86°3'31"N, 44°18'47"E     | Northwest China | Cow manure     | 16   | 300 | 1 | [54] |
| 155 | Xinjiang | 86°3'31"N, 44°18'47"E     | Northwest China | Sheep manure   | 16   | 300 | 1 | [54] |
| 156 | Xinjiang | 86°3'31"N, 44°18'47"E     | Northwest China | maize straw    | 16   | 300 | 1 | [54] |
| 157 | Ningxia  | 38°5'45"N, 105°56'17"E    | Northwest China | Cow manure     | 50   |     |   | [55] |
| 158 | Ningxia  | 38°5'45"N, 105°56'17"E    | Northwest China | Cow manure     | 33   |     |   | [55] |
| 159 | Ningxia  | 38°5'45"N, 105°56'17"E    | Northwest China | Cow manure     | 25   |     |   | [55] |
| 160 | Ningxia  | 38°5'45"N, 105°56'17"E    | Northwest China | Cow manure     | 20   |     |   | [56] |

|     |          |                         |                     |                    |    |       |   |      |
|-----|----------|-------------------------|---------------------|--------------------|----|-------|---|------|
| 161 | Sichuan  | 30°37'28"N, 104°6'27"E  | Southwest china     | Pig manure         | 30 | 150   | 1 | [56] |
| 162 | Sichuan  | 30°37'28"N, 104°6'27"E  | Southwest china     | Pig manure         | 50 | 150   | 1 | [56] |
| 163 | Shandong | 37°26'23"N, 121°31'15"E | Northeast china     | Chicken manure     | 40 | 595.5 | 1 | [56] |
| 164 | Shandong | 40°0'37"N, 116°21'51"E  | Northeast china     | Chicken manure     | 60 | 595.5 | 1 | [57] |
| 165 | Shandong | 40°0'37"N, 116°21'51"E  | Northeast china     | Chicken manure     | 80 | 595.5 | 1 | [57] |
| 166 | Hunan    | 28°19'N, 113°49'E       | South Central China | Pig manure         | 20 | 120   | 1 | [58] |
| 167 | Hunan    | 28°19'N, 113°49'E       | South Central China | biogas residue     | 20 | 120   | 1 | [58] |
| 168 | Hunan    | 28°19'N, 113°49'E       | South Central China | Pig manure         | 20 | 120   | 1 | [58] |
| 169 | Jiangxi  | 116° 8' E, 28° 58' N    | East china          | Pig manure (earle) | 25 | 180   | 2 | [59] |
| 170 | Jiangxi  | 116° 8' E, 28° 58' N    | East china          | Pig manure (earle) | 50 | 180   | 2 | [59] |
| 171 | Jiangxi  | 116° 8' E, 28° 58' N    | East china          | Pig manure (earle) | 75 | 180   | 2 | [59] |
| 172 | Jiangxi  | 116° 8' E, 28° 58' N    | East china          | Pig manure (late)  | 25 | 225   | 2 | [60] |
| 173 | Jiangxi  | 116° 8' E, 28° 58' N    | East china          | Pig manure (late)  | 50 | 225   | 2 | [60] |

|     |          |                         |                     |                   |    |     |   |      |
|-----|----------|-------------------------|---------------------|-------------------|----|-----|---|------|
| 174 | Jiangxi  | 116° 8' E, 28° 58' N    | East china          | Pig manure (late) | 75 | 225 | 2 | [60] |
| 175 | Yunnan   | 25°50' N, 100° 07' E    | Southwest china     | Cow manure        | 30 | 160 | 1 | [60] |
| 176 | Yunnan   | 25°50' N, 100° 07' E    | Southwest china     | Cow manure        | 50 | 160 | 1 | [60] |
| 177 | Yunnan   | 25°50' N, 100° 07' E    | Southwest china     | Cow manure        | 70 | 160 | 1 | [60] |
| 178 | Shandong | 36°09'N, 117°09'E       | East china          | Cow manure        | 50 | 180 | 2 | [61] |
| 179 | Shandong | 36°09'N, 117°09'E       | East china          | Cow manure        | 50 | 200 | 2 | [61] |
| 180 | Jilin    | 43°18'26"N, 124°20'10"E | Northeast china     | Pig manure        | 25 | 240 | 1 | [61] |
| 181 | jilin    | 43°18'26"N, 124°20'10"E | Northeast china     | Cow manure        | 25 | 240 | 1 | [62] |
| 182 | jilin    | 43°18'26"N, 124°20'10"E | Northeast china     | Chicken manure    | 25 | 240 | 1 | [62] |
| 183 | Hunan    | 28°22'16"N, 113°49'3"E  | South Central China | Pig manure        | 20 | 120 | 1 | [63] |
| 184 | Hunan    | 28°22'16"N, 113°49'3"E  | South Central China | biogas residue    | 20 | 120 | 1 | [63] |
| 185 | Hunan    | 28°22'16"N, 113°49'3"E  | South Central China | Pig manure        | 20 | 120 | 1 | [63] |
| 186 | Hunan    | 28°22'16"N, 113°49'3"E  | South Central China | Straw             | 20 | 120 | 1 | [64] |



|     |          |                         |                     |                        |    |       |    |      |
|-----|----------|-------------------------|---------------------|------------------------|----|-------|----|------|
| 187 | Hunan    | 28°22'16"N, 113°49'3"E  | South Central China | Pig manure             | 20 | 135   | 1  | [64] |
| 188 | Hunan    | 28°22'16"N, 113°49'3"E  | South Central China | biogas residue         | 20 | 135   | 1  | [64] |
| 189 | Hunan    | 28°22'16"N, 113°49'3"E  | South Central China | Pig manure             | 20 | 135   | 1  | [64] |
| 190 | Hunan    | 28°22'16"N, 113°49'3"E  | South Central China | Straw                  | 20 | 135   | 1  | [64] |
| 191 | Hunan    | 28°40'24"N, 112°48'4"E  | South Central China | Pig manure (early)     | 20 | 127.5 | 1  | [64] |
| 192 | Hunan    | 28°40'24"N, 112°48'4"E  | South Central China | Pig manure (early)     | 20 | 127.5 | 1  | [64] |
| 193 | Hunan    | 28°40'24"N, 112°48'4"E  | South Central China | biogas residue (early) | 20 | 127.5 | 1  | [64] |
| 194 | Hunan    | 28°40'24"N, 112°48'4"E  | South Central China | Pig manure (late)      | 20 | 150   | 1  | [65] |
| 195 | Hunan    | 28°40'24"N, 112°48'4"E  | South Central China | Pig manure (late)      | 20 | 150   | 1  | [65] |
| 196 | Hunan    | 28°40'24"N, 112°48'4"E  | South Central China | biogas residue (late)  | 20 | 150   | 1  | [65] |
| 197 | Shandong | 37°22'55"N, 117°58'15"E | East china          | Cow manure             | 30 | 150   | 15 | [65] |
| 198 | Shandong | 37°22'55"N, 117°58'15"E | East china          | Cow manure             | 50 | 150   | 15 | [65] |
| 199 | Shandong | 37°22'55"N, 117°58'15"E | East china          | Cow manure             | 70 | 150   | 15 | [65] |

|     |       |                          |                     |                        |    |        |   |      |
|-----|-------|--------------------------|---------------------|------------------------|----|--------|---|------|
| 200 | Hunan | 28°43'38"N, 112°52'28E   | South Central China | Pig manure             | 20 | 241.5  | 2 | [66] |
| 201 | Hunan | 28°43'38"N, 112°52'28E   | South Central China | Pig manure             | 20 | 241.5  | 2 | [66] |
| 202 | Hunan | 28°43'38"N, 112°52'28E   | South Central China | biogas residue         | 20 | 241.5  | 2 | [66] |
| 203 | Hunan | 28°43'38"N, 112°52'28E   | South Central China | Pig manure             | 10 | 241.5  | 2 | [67] |
| 204 | Hunan | 28°43'38"N, 112°52'28E   | South Central China | Pig manure             | 30 | 241.5  | 2 | [67] |
| 205 | Hunan | 28°46'12N, 112°53'8.52"E | South Central China | Pig manure (early)     | 10 | 171.02 | 1 | [67] |
| 206 | Hunan | 28°46'12N, 112°53'8.52"E | South Central China | Pig manure (early)     | 20 | 171.02 | 1 | [67] |
| 207 | Hunan | 28°46'12N, 112°53'8.52"E | South Central China | Pig manure (early)     | 30 | 171.02 | 1 | [67] |
| 208 | Hunan | 28°46'12N, 112°53'8.52"E | South Central China | Pig manure (early)     | 20 | 171.02 | 1 | [68] |
| 209 | Hunan | 28°46'12N, 112°53'8.52"E | South Central China | biogas residue (early) | 20 | 171.02 | 1 | [68] |
| 210 | Hunan | 28°46'12N, 112°53'8.52"E | South Central China | Straw (early)          | 10 | 171.02 | 1 | [68] |
| 211 | Hunan | 28°46'12N, 112°53'8.52"E | South Central China | Pig manure (late)      | 10 | 178.52 | 1 | [68] |
| 212 | Hunan | 28°46'12N, 112°53'8.52"E | South Central China | Pig manure (late)      | 20 | 178.52 | 1 | [68] |

|     |         |                            |                     |                       |    |        |   |      |
|-----|---------|----------------------------|---------------------|-----------------------|----|--------|---|------|
| 213 | Hunan   | 28°46'12N, 112°53'8.52"E   | South Central China | Pig manure (late)     | 30 | 178.52 | 1 | [68] |
| 214 | Hunan   | 28°46'12N, 112°53'8.52"E   | South Central China | Pig manure (late)     | 20 | 178.52 | 1 | [68] |
| 215 | Hunan   | 28°46'12N, 112°53'8.52"E   | South Central China | biogas residue (late) | 20 | 178.52 | 1 | [68] |
| 216 | Hunan   | 28°46'12N, 112°53'8.52"E   | South Central China | Straw (late)          | 10 | 178.52 | 1 | [68] |
| 217 | Henan   | 34°47'9.924"N, 113°39'46"E | South Central China | Chicken manure        | 50 | 180    | 3 | [68] |
| 218 | Henan   | 34°47'9.924"N, 113°39'46"E | South Central China | Cow manure            | 50 | 180    | 3 | [68] |
| 219 | Henan   | 35°5'37"N, 115°33'22"E     | South Central China | Horse manure          |    |        | 7 | [68] |
| 220 | Henan   | 35°5'37"N, 115°33'22"E     | South Central China | Horse manure          |    |        | 7 | [69] |
| 221 | Henan   | 35°5'37"N, 115°33'22"E     | South Central China | Wheat straw           |    |        | 7 | [69] |
| 222 | Henan   | 35°5'37"N, 115°33'22"E     | South Central China | Wheat straw           |    |        | 7 | [70] |
| 223 | Henan   | 35°5'37"N, 115°33'22"E     | South Central China | Wheat straw           |    |        | 7 | [70] |
| 224 | Beijing | 40°6'21N, 116°44'56.4"E    | North China         | Cow manure            | 30 | 210    | 1 | [70] |
| 225 | Beijing | 40°6'21N, 116°44'56.4"E    | North China         | Cow manure            | 60 | 210    | 1 | [70] |

|     |       |                         |                     |                |    |     |   |      |
|-----|-------|-------------------------|---------------------|----------------|----|-----|---|------|
| 226 | Hebei | 38°14.29'N, 114°34.5'E  | North China         | biogas residue | 10 | 300 | 1 | [70] |
| 227 | Hunan | 113°19'52"E, 28°33'04"N | South Central China | Straw(early)   |    | 120 | 6 | [71] |
| 228 | Hunan | 113°19'52"E, 28°33'04"N | South Central China | Straw(early)   |    | 120 | 6 | [71] |
| 229 | Hunan | 113°19'52"E, 28°33'04"N | South Central China | Straw(late)    |    | 150 | 6 | [72] |
| 230 | Hunan | 113°19'52"E, 28°33'04"N | South Central China | Straw(late)    |    | 150 | 6 | [73] |
| 231 | Henan | 35°09'N, 113°51'E       | South Central China | Biochar        | 40 | 225 |   | [73] |
| 232 | Jilin | 43°49'N, 125°23'56"E    | Northeast china     | Biochar        | 25 | 240 | 2 | [73] |
| 233 | Jilin | 43°49'N, 125°23'56"E    | Northeast china     | Biochar        | 50 | 240 | 2 | [73] |
| 234 | Jilin | 43°49'N, 125°23'56"E    | Northeast china     | Biochar        | 75 | 240 | 2 | [74] |
| 235 | Jilin | 43°49'N, 125°23'56"E    | Northeast china     | Cow manure     | 25 | 240 | 2 | [75] |
| 236 | Jilin | 43°49'N, 125°23'56"E    | Northeast china     | Cow manure     | 50 | 240 | 2 | [75] |
| 237 | Jilin | 43°49'N, 125°23'56"E    | Northeast china     | Cow manure     | 75 | 240 | 2 | [75] |
| 238 | Jilin | 43°49'N, 125°23'56"E    | Northeast china     | Chicken manure | 25 | 240 | 2 | [75] |

|     |          |                         |                 |                |    |        |    |      |
|-----|----------|-------------------------|-----------------|----------------|----|--------|----|------|
| 239 | Jilin    | 43°49'N, 125°23'56"E    | Northeast china | Chicken manure | 50 | 240    | 2  | [75] |
| 240 | Jilin    | 43°49'N, 125°23'56"E    | Northeast china | Chicken manure | 75 | 240    | 2  | [75] |
| 241 | Shandong | 37°220'N, 118°10'E      | East china      | biogas residue | 70 | 226    | 2  | [75] |
| 242 | Shandong | 37°220'N, 118°10'E      | East china      | biogas residue | 35 | 226    | 2  | [75] |
| 243 | Shandong | 37°220'N, 118°10'E      | East china      | biogas residue | 15 | 226    | 2  | [75] |
| 244 | Shandong | 37°220'N, 118°10'E      | East china      | biogas residue | 70 | 226    | 2  | [75] |
| 245 | Shandong | 37°220'N, 118°10'E      | East china      | biogas residue | 35 | 226    | 2  | [75] |
| 246 | Shandong | 37°220'N, 118°10'E      | East china      | biogas residue | 15 | 226    | 2  | [75] |
| 247 | Gansu    | 35°29'42"N, 107°29'36"E | Northwest China | Wheat straw    | 50 | 180    | 10 | [75] |
| 248 | Hebei    | 37°41'N, 116°36'E       | North China     | Cow manure     | 50 | 157.5  | 3  | [75] |
| 249 | Hebei    | 37°41'N, 116°36'E       | North China     | Cow manure     | 50 | 178.5  | 3  | [75] |
| 250 | Shandong | 35°26'21"N, 117°50'11"E | East china      | Cow manure     | 75 | 263.25 | 1  | [76] |
| 251 | Shandong | 35°26'21"N, 117°50'11"E | East china      | Cow manure     | 50 | 263.25 | 1  | [77] |

|     |          |                          |                     |                |      |        |    |      |
|-----|----------|--------------------------|---------------------|----------------|------|--------|----|------|
| 252 | Shandong | 35°26'21"N, 117°50'11"E  | East china          | Cow manure     | 75   | 263.25 | 1  | [77] |
| 253 | Shandong | 35°26'21"N, 117°50'11"E  | East china          | Cow manure     | 50   | 263.25 | 1  | [78] |
| 254 | Hunan    | 27°57'23N, 113°18'46.3E  | South Central China | Chicken manure | 20   | 180    | 1  | [78] |
| 255 | Hunan    | 27°57'23N, 113°18'46.3E  | South Central China | Chicken manure | 40   | 180    | 1  | [78] |
| 256 | Hunan    | 27°57'23N, 113°18'46.3E  | South Central China | Chicken manure | 60   | 180    | 1  | [78] |
| 257 | Shanghai | 30°53'N, 121°23'E        | East china          | straw          |      | 225    | 5  | [30] |
| 258 | Shanghai | 30°54'6"N, 121°40'31"E   | East china          | Pig manure     | 75   | 262.95 | 1  | [38] |
| 259 | Jiangxi  | 28°45'44"N, 115°49'59"E  | East china          | biogas residue |      | 240    | 20 | [27] |
| 260 | Jiangxi  | 28°45'44"N, 115°49'59"E  | East china          | biogas residue |      | 270    | 20 | [27] |
| 261 | Jiangxi  | 27°48'0.5"N, 115°21'18"E | East china          | Pig manure     | 16.3 | 165    | 2  | [54] |
| 262 | jiangxi  | 27°48'0.5"N, 115°21'18"E | East china          | Pig manure     | 20.5 | 165    | 2  | [54] |
| 263 | Jiangxi  | 27°48'0.5"N, 115°21'18"E | East china          | Pig manure     | 24.6 | 165    | 2  | [54] |

## References:

1. Li, L., Wang, J., Zhu, Z.M., Fan, L.Q., Wu, X., 2020. Effects of nitrogen fertilizer reduction combined with organic fertilizer/straw on soil fertility index and maize yield in Saline-Alkali land. *Chin. J. Soil Sci.* 51, 928-935.
2. Fu, W., Liu, K.P., Chen, H.S., Chen, X.B., Lin, H.F., Zhang, W., Wang, K.L., 2017. Effect of partial replacement of inorganic N with organic manure on crop yield and soil nutrient balance in arable ecosystem in karst peak-cluster depressio. *Chin. J. Eco-Agric.* 25, 812-820.
3. Wang, Y.W., Guo, J.X., Kong, Y.L., Zhang, R.Q., Song, L.X., Liu, Z.G., Zhang, J., Wang, J.Z., Guo, S.W., 2016. Nitrogen optimize management achieves high grain yield and enhances nitrogen use efficiency of rice. *J. Plant Nut. Fertil.* 22, 1157-1166.
4. Cui, Y.Z., Wu, Y.H., Hao, X.S., Zhang, C.H., Qin, Y.H., Wang, X.E., Yang, Y.X., 2019. Effects of partial replacement of chemical fertilizer by organic manure on rice yield and soil microorganisms in Hanzhong basin. *Acta Agric. Boreali-occidentalis Sinica* 28, 1689-1697.
5. Li, Y.K., Mei, X.R., Xia, X., Hao, W.P., Chen, M.P., 2018. Effect of nitrogen reduction and combined application of organic fertilizer on soil water dynamics and water and nitrogen use efficiency of summer maize in North China plain. *Research Soil Water Conservation* 25, 54-60.
6. Dang, Y., Zhang, J.J., Zhao, G., Guo, T.W., Fan, T.L., Wang, Y., Wang, L., 2015. Effect of different amount of manure on growth characteristics and yield of spring maize in calcic kastanozems soil of eastern Gansu's Loess Plateau. *Soil Fertil. Sci. in China* 62-67.

7. Liu, H., Li, J., Li, X., Zheng, Y., Feng, S., Jiang, G., 2015a. Mitigating greenhouse gas emissions through replacement of chemical fertilizer with organic manure in a temperate farmland. *Sci. Bull.* 60, 598-606.
8. Guo, X.J., Xie, J.H., Li, L.L., Wang, J.N., Kang, C.R., Peng, Z.K., Wang, J.B., Setorkwami F., Wang, L.L., 2020. Appropriate nitrogen fertilizer rate and organic N ratio for satisfactory photosynthesis and yield of maize in dry farming area of Longzhong, Gansu Province. *J. Plant Nut. Fertil.* 26, 806-816.
9. Wu, D., Huang, S.W., Jin, J.Y., 2009. Effects of nitrogen fertilizer management, organic manure application and bed-irrigation sowing on maize yield, and nutrient uptake and translocation. *Plant Nut. Fertil. Sci.* 15, 317-326.
10. Gao, H.J., Zhu, P. Peng, C., Zhang, X.Z., Li, Q., Zhang, W.J., 2015. Effects of partially replacement of inorganic N with organic materials on nitrogen efficiency of spring maize and soil inorganic nitrogen content under the same N input. *J. Plant Nut. Fert.* 21, 318-325.
11. Liao, P., Tang, J., Huang, S., Zeng, Y.J., Shi, Q.H., 2017. Combined fertilization of bio-organic fertilizer and chemical fertilizer: The effect on double cropping rice and soil properties under equivalent nutrient rates. *Chin. Agric. Sci. Bull.* 33, 16-20.
12. Wang, B.J., Cheng, W.D., Chen, G., Shen, Y.Q., Zhang, H.M., 2019. Effect of straw returning and nitrogen reduction on soil nutrition, carbon pool and rice yield in rice field. *Acta Agri. Zhejiangensis* 31, 624-630.



13. Lv, F.L., Hou, M.M., Zhang, H.T., Qiang, J.C.R., Zhou, Y.T., Lu, G.Y., Zhao, B.Q., Yang, X.Y., Zhang, S.L., 2018. Replacement ratio of chemical fertilizer nitrogen with manure under the winter wheat–summer maize rotation system in Lou soil. *J. Plant Nut. Fertil.* 24, 22–32
14. Xie, J.H., Chai, Q., Li, L.L., Zhang, R.Z., Wang, L.L., Liu, C., 2019. Effects of the substitution of inorganic nitrogen by organic nitrogen fertilizer on maize grain yield and water and nitrogen use efficiency under plastic film fully mulched ridge-furrow in semi-arid area. *Chin. J. Appl. Ecology* 30, 1199-1206.
15. Zheng, L.J., Zeng, G.Y., Wang, P.F., 2001. Effects of long-term combined application of organic fertilizer and chemical fertilizer on rice yield and soil nutrients. *Chin. Agric. Sci. Bulletin* 48-50.
16. Jing, Y.P., Li, Y., Bo, L.J, Zhang, Y.P., Wang, Y.Q., Fu, L.Y., Zhong, Z.W., 2019. Effects of partial substitution of chemical fertilizer with organic manure on crop yield and soil nitrogen migration. *Shandong Agric. Sci.* 51, 48-54.
17. Xie, J., Zhao, Y.N., Chen, X.J., Li, D.P., Xu, C.L., Wang, K., Zhang, Y.Q., Shi, X.J., 2016. Nitrogen of organic manure replacing chemical nitrogenous fertilizer improve maize yield and nitrogen uptake and utilization efficiency. *Scientia Agric. Sinica* 49, 3934-3943.
18. Li, Z., Ding, N., Guo, L.Y., Meng, J., Li, J., Li, X., Zheng, Y.H., Wu, G.L., Zen, Y., Jiang, G.M., 2013. Effects of different ratios of organic manure and chemical fertilizer on growth, yield and quality of winter wheat and summer maize. *Shandong Agric. Sci.* 45, 71-77.
19. Meng, L., Zhang, X.L., Jiang, X.F., Huang, Q.W., Xu, Y.C., Yang, X.M., Shen, Q.R., 2009. Effects of partial mineral nitrogen substitution by organic

fertilizer nitrogen on the yields of rice grains and its proper substitution rate. *J. Plant Nut. Fertil.* 15, 290-296.

20. Wang, C., Lin, Q.M., Zhao, X.R., Li, G.T., 2020b. Effects of organic fertilizer substitution on soil nutrients dynamics and production of sweet corn. *Soil Fertil. Sci. in China* 132-140.
21. Li, D.C., Li, J.M., Xu, M.G., Qin, D.Z., Shen, H.P., 2004. Effect of organic manure applied combining with inorganic fertilizer on nitrogen conformation and yield of rice in red soil paddy field. *hunan agric. Sci.* 23-25.
22. Xi, B., Zhai, L.M., Liu, S., Liu, H.B., Yang, B., Ren, T.Z., 2015. Effects of combination of organic and inorganic fertilization on maize yield and soil nitrogen and phosphorus leaching. *J. Plant Nut. Fertil.* 21, 326-335.
23. Yang, X.M., Li, G.H., Li, G.C., Zhou, Y., Liu, Z.D., Fujio, N., Yin, C.B., 2014. Effects of combined application of chemical fertilizer with manure on yield and nitrogen use efficiency of winter wheat in cinnamon soil on North China plain. *Soil Fertil. Sci. in China* 48-52.
24. Zhang, J.J., Fan, T.L., Zhao, G., Dang, Y., Wang, L., Li, S.Z., 2017. Yield and water use efficiency of winter wheat in response to long-term application of organic fertilizer from different nitrogen resources replacing partial chemical nitrogen in dry land of Eastern Gansu Province. *Acta Agronomica Sinica* 43, 1077-1086.
25. Meng, L., Wang, Q., Huang, Q.W., Yang, X.M., Xu, Y.C., Shen, Q.R., 2008. Effects of combined application of pig manure compost and inorganic fertilizers

on yield of rice grain and nitrogen use efficiency. *J. Ecology Rural Environ.* 68-71.

26. Xu, M.G., Li, D.C., Li, J.M., Qin, D.Z., Yagi, K., Hosen, Y., 2008. Effects of organic manure application with chemical fertilizers on nutrient absorption and yield of rice in Hunan of Southern China. *Agric. Sci. in China* 7, 1245-1252
27. Peng, Z.Y., Li, Z.L., Zhang, J.H., Zhang, D.Y., Yu, S.Q., Huang, N., Gou, C.M., 2020. Effects of reducing the application rate of chemical fertilizers combined with application of an organic fertilizer on the yield and quality of liquor - making corn. *Barley Cereal Sci.* 37, 32-38.
28. Guan, G., Tu, S., Yang, J., Zhang, J., Yang, L., 2011. A field study on effects of nitrogen fertilization modes on nutrient uptake, crop yield and soil biological properties in rice-wheat rotation system. *Agric. Sci. in China* 10, 1254-1261.
29. Guo, L., Wu, G., Li, Y., Li, C., Liu, W., Meng, J., Liu, H., Yu, X., Jiang, G., 2016. Effects of cattle manure compost combined with chemical fertilizer on topsoil organic matter, bulk density and earthworm activity in a wheat–maize rotation system in Eastern China. *Soil Till. Research* 156, 140-147.
30. Sun, H., Zhou, S., Zhang, J., Zhang, X., Wang, C., 2020. Effects of controlled-release fertilizer on rice grain yield, nitrogen use efficiency, and greenhouse gas emissions in a paddy field with straw incorporation. *Field Crop Res.* 253, 107814.
31. Duan, Y., Xu, M., Gao, S., Yang, X., Huang, S., Liu, H., Wang, B., 2014. Nitrogen use efficiency in a wheat-corn cropping system from 15 years of manure and fertilizer applications. *Field Crop Res.* 157, 47-56.

32. Yang, Y.J., Lei, T., Du, W., Liang, C.L., Li, H.D., Lv, J.L., 2020. Substituting chemical fertilizer nitrogen with organic manure and comparing their nitrogen use efficiency and winter wheat yield. *J. Agric. Sci.* 158, 262-268.
33. Wang, B.J., Cheng, W.D., Chen, G., Shen, Y.Q., Zhang, H.M., 2019. Effect of straw returning and nitrogen reduction on soil nutrition, carbon pool and rice yield in rice field. *Acta Agri. Zhejiangensis* 31, 624-630.
34. Shi, D.L., Wang, X.L., Duan, J.J., Liu, A.K., Luo, A.H., Li, R.D., Hou, Z.F., 2020. Effects of chemical N fertilizer reduction combined with biochar application on soil organic carbon active components and mineralization in paddy fields of yellow soil. *Chin. J. Appl. Ecology* 31, 4117-4124.
35. Fang, C., Dai, Z.W., Li, W.M., Wang, D.S., Jiao, J.G., Chen, X.Y., Xu, L., 2021. Effects of reduced chemical fertilizer with organic fertilizer application on the yield and grain quality of sweet-waxy corn. *Chin. J. Ecology* 1000-4890.
36. Lan, X.J., Liu, Y.R., Hou, H.Q., Lv, Z.Z., Ji, J.H., Feng, Z.B., Liu, X.M., 2021. Effect of long-term organic manure application combined with chemical fertilizers on soil microbial biomass and organic matter structure in red paddy soil. *J. Agric. Resources Environ.* 1005-4944
37. Sun, M.H., Jiang, B.S., Shen, J.L., Song, B.L., Li, Q.Y., Li, Y., Wu, J.S., . 2021. The effects of combined application of pig manure and chemical fertilizers on soil nitrogen contents and nitrogen use efficiency in a subtropical paddy field. *Research Agric. Modernization* 42, 175-183.
38. Huang, L.L., Jin, H.Y., Wang, Z.F., Yan, J., Gu, J.Q., Gu, A.J., 2021. Effects of fertilizer reduction combined with organic fertilizer on yield and nitrogen use

efficiency in paddy. J. Anhui Agric. Sci. 49, 138–142.

39. Hong, Y., Wang, F., Liu, R.L., Li, Y.H., Zhao, T.C., Chen, C., 2017. Effects of long-term fertilization on yield and nitrogen utilization of spring maize in irrigation silting soils. J. Soil Water Conservation 31, 248-252.
40. Lu, Y.X., Cui, X.W., Fan, H.S., Long, S.P., Peng, F.Y., 2015. Effects of combined application of manure and chemical fertilizer on the growth and yield of rice and soil biological characters in paddy soils. Soil Fertil. Sci. in China 50-55.
41. Gu, J., Li, S.X., Gao, H., Li, M.L., Qin, Q.J., Cheng, K., 2004. Effect of organic-inorganic fertilizers on the water use efficiency of crops in dry land. Agric. Research Arid Areas 142-145.
42. Zhu, Y., Wang, Z.Y., Peng, Y.N., Gong, X.F., Jin, X.J., Zhou, J.P., 2015. Changes of soil nutrients and microbial communities under the condition of organic fertilizers replacing part of chemical fertilizers. Chin. J. Soil Sci. 46, 1161-1167.
43. Yi, C.X., Kong, L.L., Li, Q., Hou, Y.P., Qin, Y.B., Wang, M., Liu, Z.Q., Gao, M., 2020. Effects of partial substitution of chemical fertilizer with organic manure on rice yield, nutrients absorption and translocation under optimized fertilization. J. Northeast Agric. Sci. 45, 59-63.
44. Pei, X.X., Dang, J.Y., Zhang, D.Y., Zhang, J., Cheng, M.F., Wang, J.A., 2020. Effects of organic substitution on the yield and nutrient absorption and utilization of wheat under chemical fertilizer reduction. J. Plant Nut. Fertil. 26, 1768-1781.

45. Zhang, Q.R., Xie, Y.H., Li, T.L., Liu, K., Jiang, L.W., Cao, J., Shao, J.L., 2020. Effects of organic fertilizers replacing chemical fertilizers on yield, nutrient use efficiency, economic and environmental benefits of dry land wheat. *Scientia Agric. Sinica* 53, 4866-4878.
46. Ma, F.F., Xing, S.L., Gan, M.Q., Liu, P.S., Huang, Y., Gan, X.Y., Ma, Y.H., 2019. Effects of organic fertilizer substituting for chemical fertilizer on rice yield, soil fertility and nitrogen and phosphorus loss in farmland. *Crops* 89-96.
47. Peng, Y.L., Zhu, J.Y., Tang, J.J., Zhang, M.L., 2004. Effects of Long-term Mixed application of organic-inorganic fertilizers on the yield and dry matter producing characters of rice. *Acta Agric. Universitatis Jiangxiensis*, 485-490.
48. Liang, J.Y., Wang, C.Q., Li, B., Long, S.F., Chen, L., 2019. Effects of combined application of pig manure with urea on grain yield and nitrogen utilization efficiency in rice-wheat rotation system. *Chin. J. Appl. Ecology* 30, 1088-1096.
49. Shi, X.R., Ren, B.B., Jiang, L.L., Fan, S.X., Cao, Y.L., Ma, D.R., 2021. Effects of organic manure partial substitution for chemical fertilizer on the photosynthetic rate, nitrogen use efficiency and yield of rice. *Chin. J. Appl. Ecology* 32, 154-162.
50. Tang, X.G., Qin, W.J., Xie, J.S., Wang, P., Hou, H.Q., Li, Z.Z., Liu, G.R., 2018. Effects of organic pig manure application with different proportions on grain nitrogen contents at different positions of rice spike. *J. Southern Agric.* 49, 1940-1945.
51. Liu, H.J., Jiang, H.W., Sun, G.F., Shen, M.X., Chen, L.G., Zheng, J.C., 2017. Effect of different organic-inorganic fertilizers combination ratio on nitrogen

use efficiency of rice. *Soil Fertil. Sci. in China* 61-66

52. Zhou, Y., Li, Y.M., Fan, M.P., Wang, Z.L., Xu, Z., Zhang, D., Zhao, J.X., 2019. Effects of nitrogen in organic manure replacing chemical nitrogenous fertilizer on aggregates of red soil, maize yield and quality. *Crops* 125-132.
53. Lang, X.F., Xu, Y.C., Shen, Q.R., 2008. Effect of formation of organic-inorganic mixed fertilizers on soil N supply and growth of maize. *J. Ecology Rural Environ.* 33-38.
54. Yao, D.H., Wei, Z.Q., Yan, X., Lu, Z.H., Wu, J.F., 2020. Effects of commercial organic fertilizer partially replacing chemical fertilizer on yield and heavy metal content of double-season rice. *Acta Agric. Universitatis Jiang* 42, 863-871.
55. Meng, C.R., Bai, R.X., Hou J.W., Zhang, X.J., Zhang, H.Y., Wei, C.Z., 2020. Effects of organic materials partially substituting chemical fertilizer on nutrient uptake and yield of maize under drip irrigation in arid region. *Soils* 52, 750-757.
56. Liu, M., Ji, L.D., Wang, R., Si, H.L., Liu, X.T., 2020. Effect of organic and inorganic fertilizer combination on silage maize growth and soil chemical. *Ningxia J. Agric. Forestry Sci. Techn.* 61, 18-21.
57. Chen, K., Yu, H., Shangguang, Y.X., Zhou, Z.J., Zeng, X.Z., Guo, S, Qin, Y.S., 2020. Impacts of organic-inorganic fertilizer application on yield of rice and soil properties in the waterlogged paddy field. *Crops* 26, 32-35.

58. Xue, T.X., Zhang, K.X., Kong, Q.F., Yang, S.J., Zhang, Z.H., Wang, H.Q., 2020. Effect of combined application of antibiotic—free chicken manure with chemical fertilizer on corn growth and soil properties. *Shandong Agric. Sci.* 52, 106-111.
59. Zhu, W.B., Liu, M.D., Xiao, X., He, N., Yang, D., Xie, G.X., 2019. Effects of chemical fertilizer combined with organic manure on early rice yield and nitrogen fate in paddy field. *J. Shenyang Agric. University* 50, 728-733.
60. Qian, Y.F., Shao, C.H., Qin, C.F., Chen, X.M., Guan, X.J., Chen, J., Xie, J., Deng, G.Q., Peng, C.R., 2019. Effects of combined application of pig manure and chemical fertilizer on yield and nitrogen uptake and utilization of double cropping rice. *Acta Agric. Jiangxi* 31, 27-34.
61. Li, M., Wang, C.X., Shu, Z.W., Wang, Z., Chen, J.J., Li, Y., Zu, YQ., Zhang, K.Q., 2019. Infiltration water nitrogen loss and rice nitrogen accumulation in a paddy field fertilized with a combination ratio of cow manure and chemical fertilizer. *J. Agro-Environ. Sci.* 38, 903-911.
62. Yang, Q.L., Liu, P., Dong, S.T., Zhang, J.W., Zhao, B., Li, R.F., Ren, H., Ren, H., Han, X.F., 2018. Effects of combined application of manure and chemical fertilizers on loss of gaseous nitrogen and yield of summer maize. *Scientia Agric. Sinica* 51, 2476-2488.
63. Huang, Z.H., Cao, G.J., Geng, Y.H., Pan, J.Z., Xing, W.M., 2019. Effects of organic manure partial substitution for chemical N fertilizer on the dynamic change of soil Nitrate N and maize yield. *J. Maize Sci.* 27, 151-158.
64. Tan, L.Z., Li, W.B., Huang, S.Y., Yuan, H.L., Yang, L., Liu, Q., Xie, G.X., 2018. Effect of long-term organic and inorganic fertilizer combined application on



yield and nitrogen use efficiency in double rice. J. Hunan Agric. University (Nat. Sci.) 44, 188-192.

65. Xiang, X.Y., Liu, Q., Rong, X.M., Xie, G.X., Peng, J.W., Huang, W.M., 2014. Effects of different combined application of organic manures and inorganic fertilizer on yield and N use efficiency of double-rice. J. Hunan Agric. University (Nat. Sci.) 40, 72-77.
66. Liu, S.Y., D, X., Zhu, S.X., Han, G.H., Wei, D.J., 2013. Effects of different application portions of organic and chemical fertilizers on rice yield in areas along the yellow river. Shandong Agric. Sci. 45, 90-93.
67. Zhang, Y.P., Rong, X.M., Liu, Q., Xie, G.X., Huang, T., Wu, W., 2012. Effects of combination of organic manure and inorganic fertilizer on yield, quality and metabolism of carbon and nitrogen of spring maize. J. Hunan Agric. University (Nat. Sci.) 38, 319-324.
68. Song, X.L., Liu, Q., Rong, X.M., Xie, G.X., Zhang, Y.P., 2011. Effects of interated fertilization with pig compost and fertilizers on yield of rices grains and nitrogen use efficiency. J. Hunan Agric. University (Nat. Sci.) 37, 440-445.
69. Xie, Y.X., Wang, X.M., Feng, W., Zhu, Y.J., Wang, C.Y., Guo, T.C., 2010. Effects of application of inorganic fertilizer combined with organic manure on photo synthesis and yields of winter wheat. J. Henan Agric. University 44, 117-120.
70. Zhang, G.R., 2008. The Influence of mixed application of NPK-organic fertilizers to growth characters and yield of winter wheat., J. Anhui Agri. Sci. 6855-6856.

71. Wang, J.N., Xie, J.H., Li, L.L., Wang, L.L., Kang, C.R., Guo, X.J., Peng, Z.K., Wang, J.B., Zechariah, E., 2020a. Effects of replacing of chemical fertilizer with organic fertilizer on photosynthetic characteristics and yield of maize in rainfed farming areas of central Gansu, China. *J. Gansu Agric. university* 55, 29-36.
72. Qin, X.C., Pan, J.T., Guo, S.F., Zhai, L.M., Wang, H.Y., Wu, S.X., Liu, H.B., 2020. Effects of chemical fertilizer reduction combined with biogas fertilizer on crop yield of wheat–maize rotation and soil nitrogen loss in North China plain. *J. Agro-Environ. Sci.* 39, 1558-1567.
73. Liu, J., Jiang, B., Shen, J., Zhu, X., Yi, W., Li, Y., Wu, J., 2021. Contrasting effects of straw and straw-derived biochar applications on soil carbon accumulation and nitrogen use efficiency in double-rice cropping systems. *Agric., Ecosystems & Environ.* 311, 107286.
74. Zheng, J., Han, J., Liu, Z., Xia, W., Zhang, X., Li, L., Liu, X., Bian, R., Cheng, K., Zheng, J., Pan, G., 2017. Biochar compound fertilizer increases nitrogen productivity and economic benefits but decreases carbon emission of maize production. *Agric., Ecosystems & Environ.* 241, 70-78.
75. Geng, Y., Cao, G., Wang, L., Wang, S., 2019. Effects of equal chemical fertilizer substitutions with organic manure on yield, dry matter, and nitrogen uptake of spring maize and soil nitrogen distribution. *Plos One* 14, e219512.
76. Zhang, J.J., Fan, T.L., Zhao, G., Dang, Y., Wang, L., Li, S.Z., 2017. Yield and water use efficiency of winter wheat in response to long-term application of organic fertilizer from different nitrogen resources replacing partial chemical nitrogen in dry land of Eastern Gansu Province. *Acta Agronomica Sinica* 43,

1077-1086.

77. Wang, X., Yang, Y., Zhao, J., Nie, J., Zang, H., Zeng, Z., Olesen, J.E., 2020c. Yield benefits from replacing chemical fertilizers with manure under water deficient conditions of the winter wheat-summer maize system in the North China Plain. *Eur. J. Agron.* 119, 126118.
78. Liu, J., Luo, Z.C., Xiao, X.P., Qu, D.M., Sun, G., Hong, X., Luo, X.S., Luo, Z.Y., Yu, C.X., 2015b. Effects of combined application of organic and inorganic fertilizers on fertility and rice growth in cold spring paddy soil. *Soil Fertil. Sci. in China* 23-27.
